# Supplementary material
Source: PubMed Central journal article supplement (PMC7149309)
Supplement: pnas.1915255117.sapp.pdf [file pnas.1915255117.sapp.pdf]

1  
2  
3  
4  
5  
6  
7  
8  
9  
10  
11  
12  
13  
14  
15  
16  
17  
18  
19  
20  
21  
22  
23  
24  
25  
26  
27  
28  
29  
30  
31  
32  
33  
34  
35  
36  
37

Supplementary Appendix for:

*Clostridioides difficile* infection damages colonic stem cells via TcdB, impairing epithelial repair and recovery from disease.

Steven J. Mileto<sup>1 †</sup>, Thierry Jardé<sup>2, 3 †</sup>, Kevin O. Childress<sup>4 †</sup>, Jaime L. Jensen<sup>4</sup>, Ashleigh P. Rogers<sup>1</sup>, Genevieve Kerr<sup>2</sup>, Melanie L. Hutton<sup>1</sup>, Michael J. Sheedlo<sup>4</sup>, Sarah C. Bloch<sup>4</sup>, John A. Shupe<sup>4</sup>, Katja Horvay<sup>2</sup>, Tracey Flores<sup>2</sup>, Rebekah Engel<sup>2, 5</sup>, Simon Wilkins<sup>5, 6</sup>, Paul J. McMurrick<sup>5</sup>, D. Borden Lacy<sup>4, 5\* †</sup>, Helen E. Abud<sup>2, 5, 6\* †</sup> and Dena Lyras<sup>1\* †</sup>.

**Affiliations:**

<sup>1</sup> Infection and Immunity Program, Monash Biomedicine Discovery Institute and Department of Microbiology, Monash University, Clayton, Victoria, Australia, 3800.

<sup>2</sup> Development and Stem Cells Program, Monash Biomedicine Discovery Institute and Department of Anatomy and Developmental Biology, Monash University, Clayton, Victoria, Australia, 3800.

<sup>3</sup> Centre for Cancer Research, Hudson Institute of Medical Research, Clayton VIC, Australia.

<sup>4</sup> Department of Pathology, Microbiology and Immunology, Vanderbilt University Medical Center, Nashville, TN, USA 37232.

<sup>5</sup> The Veterans Affairs Tennessee Valley Healthcare System, Nashville, TN, USA 37232.

<sup>6</sup> Department of Epidemiology and Preventive Medicine, School of Public Health and Preventive Medicine, Monash University, VIC 3004, Australia

† These authors contributed equally.

\* Correspondence to: Dena Lyras, Helen Abud and D. Borden Lacy

**Email:** dena.lyras@monash.edu, helen.abud@monash.edu and borden.lacy@vanderbilt.edu.

**This PDF file includes:**

- Supplementary text
- Figure legends for Fig. S1 to S5
- Tables S1
- SI References

38

39 **Supplementary Materials and Methods**

40 **Bacterial strains, and growth conditions**

41 *C. difficile* strains (see Table S1) were cultured on HIS-T agar (heart infusion (HI) (Oxoid)  
42 supplemented with 1.5% glucose, 0.1% (w/v) L-cysteine, 1.5% (w/v) agar and 0.1% (w/v) sodium  
43 taurocholate (New Zealand Pharmaceuticals)), prior to inoculation into 500 mL Tryptone Yeast (TY)  
44 broth (3% tryptone (Oxoid), 2% yeast extract (Oxoid) and 0.1% sodium thioglycolate (Sigma-  
45 Aldrich)) and grown for seven days anaerobically at 37°C. Spores were harvested by centrifugation  
46 at 10,000 *g* for 20 minutes at 4°C, washed eight times with chilled dH<sub>2</sub>O and resuspended in  
47 Phosphate Buffered Saline (PBS) containing 0.05% Tween-80 (PBS-T) prior to heat-shocking at  
48 65°C for 20 minutes.

49 **Cell Lines and Reagents**

50 HEK293 STF cells were a gift from Dr. J. Nathans (Johns Hopkins University) and were  
51 maintained in Dulbecco's Modified Eagle's medium, high glucose (Gibco) with 8% FBS. All cells  
52 were grown in a humidified incubator at 37°C with 5% CO<sub>2</sub> atmosphere.

53 **Recombinant protein cloning, expression and purification.**

54 Site directed mutagenesis was used to generate VPI10463 TcdB<sup>GFE</sup> (pBL881) in pHis1622-  
55 VPI10463-TcdB-C-term-8X-His (pBL377) with primers F-  
56 GAAAGTATGAATATAAAAAGTATTTTCGGATTTCGAGAATATTAAGTTTATA and R-  
57 CTTATTATAAAATTAGCATCTAATATAAACTTAATATTCTCGAATCCGAAAATACTTTTTAT.  
58 pHis1622-M7404-TcdB-C-term-6X-His plasmid (pBL598) was a gift from Dr. J. Ballard (University  
59 of Oklahoma Health Sciences Center). Recombinant TcdB proteins were expressed in *Bacillus*  
60 *megaterium* and purified as previously described (1).

61 PNGase F expression vector pOPH6 (pBL831) was a gift from Shaun Lott (Addgene  
62 plasmid # 40315). pOPH6 was transformed into *E. coli* BL21 DE3 cells. Overnight cultures were  
63 prepared in 5 mL Luria Broth (LB) at 37°C and inoculated into 250 mL LB the following day. This

64 culture was shaken at 220 rpm at 37°C and grown to an OD<sub>600</sub> of 0.6. Expression of PNGase F  
65 was induced with 0.25 mM IPTG, followed by an overnight incubation at 18°C. PNGase F was  
66 purified as outlined (2).

67 FZD2-CRD (residues 24-156), CSPG4 (residues 400-764), and NECTIN-3 (residues 58-  
68 302) DNA was cloned into pCDNA3.4 with an N-terminal human serum albumin secretion peptide  
69 (MKWVTFISLLFLFSSAYS) and a C-terminal TEV protease site and 6X-His tag (Thermo Fisher  
70 Scientific) to generate the plasmids pBL808, pBL790, and pBL787 respectively. The receptors were  
71 expressed in ExpiCHO cells (Thermo Fisher Scientific) in 25 mL according to the manufacturer's  
72 protocol. ExpiCHO supernatant was collected, and receptors were purified using cobalt-nitriloacetic  
73 acid resin (GE) and concentrated to 1 mL using 3 kDa or 10 kDa molecular weight cutoff filters  
74 (MilliporeSigma). FZD2-CRD and CSPG4 were treated with a 1:10 molar ratio of PNGaseF to  
75 receptor for 16 hours at 37°C. The receptors were further purified using size exclusion  
76 chromatography with an S-75 column. The receptors were stored in 20 mM HEPES pH 8.0, 100  
77 mM NaCl.

## 78 **Microscale Thermophoresis**

79 Microscale thermophoresis (MST) experiments were performed on a NanoTemper  
80 Monolith NT.115 (NanoTemper Technologies GmbH, Munich, Germany). VPI TcdB<sub>10463</sub>, TcdB<sub>027</sub>,  
81 VPI TcdB<sub>10463</sub><sup>GFE</sup>, FZD2-CRD, CSPG4, and NECTIN-3 were equilibrated prior to labelling with size  
82 exclusion chromatography using either a Superdex 200 10/300 or Superdex 75 10/300 column  
83 (GE) with 20 mM HEPES pH 8.0, 100 mM NaCl. Toxins, CSPG4, and NECTIN-3 were labelled with  
84 the Monolith NT His-tag Labelling Kit RED-tris-NTA, following the manufacturer's instructions. TcdB  
85 or receptor concentration was held constant at 50 nM. Serial dilutions of FZD2-CRD or TcdB were  
86 prepared using a 1:1 dilution from 3-10 µM to 90-300 pM in 20 mM HEPES pH 8.0, 100 mM NaCl,  
87 0.05% Tween-20, and protease inhibitor cocktail for His-tagged proteins (Sigma). Samples were  
88 loaded into Monolith NT.115 capillaries (NanoTemper), and measurements carried out at 21°C with  
89 40% MST power and 60% excitation power. MO.Control v1.6 was used for data collection, and  
90 MO.Affinity Analysis v2.3 and PALMIST were used for data analysis (3). The K<sub>D</sub> constants were

91 calculated in PALMIST utilizing the saturation binding curve at equilibrium.

## 92 **Animal model of *C. difficile* infection**

93 Animal handling and experimentation was performed according to Victorian State  
94 Government regulations, approved by the Monash University Animal Ethics Committee (Monash  
95 University AEC no. SOBSB/M/2010/25 and MARP/2014/135). Time-course animal infections were  
96 conducted using the Monash mouse model of CDI as previously described (4, 5), with the following  
97 modifications. Three days prior to infection, at the completion of the seven day antibiotic cocktail  
98 pre-treatment described previously (4, 5), mice were switched to water containing cefaclor (300  
99 µg/mL), *ad libitum*, and returned to untreated water on the day of infection. Male, six to eight week  
100 old, C57BL/6J mice (Walter and Eliza Hall Institute of Medical Research) were challenged with 10<sup>6</sup>  
101 spores of a single strain of *C. difficile* by gastric inoculation and were monitored twice daily as  
102 described previously for disease signs (including weight loss, behavioral changes and diarrhea) (5).  
103 For the time course of infection experiments, mice were euthanized at either 12, 24 or 48-hours  
104 post-infection or upon reaching the following endpoints for the genetically diverse strains  
105 comparison: acute weight loss of greater than 10% relative to the day of infection (day zero) in the  
106 first 24-hours or chronic weight loss of greater than 15% relative to day zero thereafter, or on  
107 animals becoming moribund, showing low activity, labored breathing, severe diarrhea, and a scruffy  
108 coat. For the recovery model of infection, mice that reached a weight loss of greater than 10%  
109 relative to the day of infection but less than 15% relative to day zero at the peak of infection (48-  
110 hours) were allowed to recover for either 7 days or 14 days before being euthanized. Fecal pellets  
111 were collected from all animals and resuspended at 100 mg/mL in sterile PBS before culturing on  
112 supplemented Heart Infusion agar, as previously described (4). Weight loss relative to day zero  
113 (D0) was plotted for each group/time-point and analyzed with Graph Pad Prism 7 using a one-way  
114 ANOVA and Tukey's test. For the panel of clinical and animal *C. difficile* strains, feces collected at  
115 24 hours post infection was further diluted to 50 mg/ml in PBS. The diluted feces were used to  
116 determine toxin levels within the infected mice. To do this, these preparations were filter sterilized  
117 using 0.45 µm and 0.22 µm filters (Sartorius) and two-fold serial dilutions of the fecal supernatants

118 were prepared in Minimal Essential Medium (MEM)  $\alpha$  (Gibco, ThermoFisher Scientific) or McCoy's  
119 5A (modified) Medium (Gibco, ThermoFisher Scientific) supplemented with 1% (v/v) heat  
120 inactivated fetal calf serum (HI-FCS). Vero and HT-29 cells were cultured and prepared as  
121 previously described (6). Cells were seeded in 96-well plates at  $1 \times 10^4$  cells/well, and incubated  
122 for 24 hours at 37°C in 5% CO<sub>2</sub> prior to exposing these cells to the filtered fecal content. All  
123 conditions were prepared in technical duplicated and at least four biological replicates.  
124 Morphological changes were observed after 18 hours using an Olympus 1X71 inverted microscope  
125 at 20x magnification. The toxin titre was evaluated as the final dilution at with 100% cell rounding,  
126 in comparison to the negative control wells, and was scored before analyzing with Graph Pad Prism  
127 7 using a Mann-Whitney *U* test.

128 Four micron sections of formalin fixed (10% neutral buffered), Swiss-rolled colon and  
129 caecum were periodic acid–Schiff/Alcian blue stained by the Monash Histology Platform and  
130 assessed using a previously described scoring system (5). Stained sections were scanned for  
131 visualization using an Aperio Scanscope AT Turbo, at 20x magnification. For recovery mice, crypt  
132 length was measured for 30 crypts/mouse at equal points across the entire length of the colon,  
133 using the measure tool within Aperio ImageScope. All histopathological analysis was performed  
134 blind and analyzed with Graph Pad Prism 7 using a Mann-Whitney *U* test.

### 135 **Animal model of *C. difficile* intoxication**

136 All mouse experiments were approved by Vanderbilt Institutional Animal Care and Use  
137 Committee (IACUC). Female, five to eight-week old C57BL/6 mice (Jackson Laboratories) were  
138 housed five to a cage with free access to food and water. After a four-day acclimation period, mice  
139 were switched to water containing cefoperazone (500  $\mu$ g/mL) for five days, with changes every 48-  
140 hours. After five days, cefoperazone treated water was switched back to untreated water and a 48-  
141 hour recovery period was allowed before being intoxicated with a 200  $\mu$ L volume of 50  $\mu$ g TcdB  
142 (VPI10463, VPI10463 GFE, or 027) or PBS as a control.

143 For the intoxication procedure, mice were anesthetized with isoflurane. A 21 gauge flexible  
144 gavage was inserted approximately 2 cm in *via* the rectum and each condition was slowly

145 administered. Rectal pressure was applied for 30 seconds to prevent immediate leakage, and mice  
146 were placed in a clean cage to recover. After four hours, the mice were euthanized by CO<sub>2</sub> gas,  
147 the abdomens were opened up, and colons extracted. Each colon was flushed with PBS, Swiss-  
148 rolled, and fixed in 10% formalin. After embedding in paraffin, the colonic tissue was sliced,  
149 mounted to a microscope slide, and stained with H&E by the Translational Pathology Shared  
150 Resource (TPSR) center at Vanderbilt University Medical Center. The tissue was then scored for  
151 edema, inflammation, and epithelial injury as previously described (7) by a pathologist blinded to  
152 the experimental conditions.

### 153 **Immunohistochemistry and Immunofluorescence analysis**

154 Paraffin-embedded colonic tissues were processed using standard procedures. Slides  
155 were de-waxed and antigen retrieval was performed using 10 mM citrate (Sigma-Aldrich) buffer,  
156 with 0.05% Tween-20 (Amresco), pH 6.0. Slides were blocked for 60 minutes with CAS-Block™  
157 (Thermo-Fisher Scientific) at room temperature. For immunofluorescence staining, slides were  
158 incubated with either mouse anti-ezrin (Thermo-Fisher Scientific; 1:200 dilution in 1% Bovine serum  
159 albumin (BSA; Sigma Aldrich) in PBS) or mouse anti-β-catenin (BD; 1:200 dilution in 1% BSA) and  
160 rabbit anti-E-cadherin (Cell Signaling; 1:200 dilution in 1% BSA) overnight at 4°C. Slides were  
161 rinsed three times in PBS before incubation with secondary antibodies for 60 minutes at room  
162 temperature. For ezrin and β-catenin, goat anti-mouse IgG, Alexa Fluor® 488 (Thermo-Fisher  
163 Scientific; 1:1000 dilution in 1% BSA) was used, for E-cadherin goat anti-rabbit IgG, Alexa Fluor®  
164 568 (Thermo-Fisher Scientific; 1:1000 dilution in 1% BSA) was used. Slides were washed three  
165 times in PBS before staining the nuclei with DAPI (300 nM, Thermo Fisher). Slides were mounted  
166 with ProLong® Gold (Thermo Fisher), sealed and imaged using a Leica SP8 Confocal Invert  
167 microscope on a 20x/1.0 oil objective with LasX Software (Leica).

168 For immunohistochemical staining for activated caspase-3, dewaxing, antigen retrieval and  
169 blocking was performed as above. Slides were then incubated overnight with rabbit anti-cleaved  
170 caspase-3 antibody (Cell Signaling; 1:250 dilution). Slides were rinsed three times in PBS before  
171 secondary antibody incubation for 60 minutes at room temperature with HRP conjugated goat anti-

172 rabbit IgG (Thermo-Fisher Scientific; 1:200 dilution). All antibodies were diluted in 1% BSA in PBS.  
173 Slides were washed three times, before incubating with 3,3'-Diaminobenzidine (DAB) reagent  
174 (Dako) for up to five minutes, until color developed. Slides were immediately washed three times  
175 in PBS before staining the nuclei with Mayer's Haematoxylin (Amber Scientific) for three minutes  
176 prior to washing and mounting with D.P.X. Stained sections were scanned for visualization using  
177 an Aperio Scanscope AT Turbo, at 20x magnification. Caspase-3 positive cells were counted per  
178 700  $\mu\text{m}$  field of view. Counts of cells positive for activated caspase-3 were graphed with GraphPad  
179 Prism 7, and tested for statistical differences using a Mann-Whitney *U* test.

### 180 **Colonic stem cell sorting and quantitative PCR for stem cell and TcdB receptors**

181 Mouse colonic crypt isolation and organoid establishment were based on protocols  
182 previously described (8-10). Intact, dissected colons from adult LGR5-eGFP-IRES-CreERT2  
183 mice (11) (a pool of 10 colons was used per biological replicate) were flushed with 50 mL of cold  
184 PBS to remove luminal contents, cut longitudinally and scraped with a glass cover slip to remove  
185 epithelial fragments, mucus and feces. Colons were cut into 5 mm pieces and washed in cold PBS  
186 before digestion with 4 mM EDTA. To isolate crypts, the tissue fragments were vigorously  
187 suspended in cold PBS using a 10 mL pipette. This procedure was repeated a total of three times.  
188 Crypts were pelleted by centrifugation at 240 *g* for five minutes, at 4°C. The collected crypts were  
189 then dissociated in TrypLE Express (Invitrogen) supplemented with 10  $\mu\text{M}$  Y-27632 Rock inhibitor  
190 (Abcam) and DNase 1 (Sigma-Aldrich) for four minutes at 37°C. Cell clumps and mucus were  
191 removed using a 70  $\mu\text{m}$  cell strainer (BD Biosciences). The remaining dissociated cells were  
192 washed twice with PBS and collected by centrifugation at 4°C at 240 *g* for five minutes. Antibody  
193 labelling step as well as the final resuspension of the sample were performed with PBS  
194 supplemented with 2 mM EDTA, 2% FBS and 10  $\mu\text{M}$  Y-27632 Rock inhibitor. As previously  
195 described (9), cellularized crypts were incubated with anti-CD31-BV510 (1:200, clone: MEC 13.3,  
196 BD Horizon), anti-CD45-BV510 (1:200, clone: 30-F11, BD Horizon) and anti-CD24-PeCy7 (1:100,  
197 clone: M1/69, eBioscience) antibodies in a 500  $\mu\text{L}$  volume for 15 minutes on ice. After washing  
198 twice with PBS, the cells were resuspended in a final volume of 1 mL, passed through a 70  $\mu\text{m}$

199 strainer and transferred into appropriate FACS tubes containing propidium iodine (PI) at a  
200 concentration of 2 µg/mL. Cell sorting was carried out with a 100 µm nozzle on an Influx instrument  
201 (BD Biosciences). Aggregates, debris, dead cells (PI+), and CD45+/CD31+  
202 hematopoietic/endothelial contaminants were depleted. For the LGR5-GFP<sup>high</sup> cell population,  
203 around 2% of the CD24<sup>+</sup> LGR5-GFP brightest cells were selected. The subsequent 2% of the  
204 CD24<sup>+</sup> LGR5-GFP<sup>+</sup> cells were considered as LGR5-GFP<sup>med</sup> and LGR5-GFP<sup>low</sup> cell populations. A  
205 fully differentiated cell population, identified as CD24<sup>-</sup> LGR5<sup>-</sup>, was also isolated. Purity of collected  
206 fractions was confirmed by reanalysis of a small fraction of the sorted cells.

207         Following FACS, cells were centrifuged at 240 g for five minutes at 4°C and resuspended  
208 in RLT buffer. RNA was then extracted using the Qiagen RNeasy Microkit following the  
209 manufacturer's instructions, and used to synthesize cDNA, using a QuantiTect Reverse  
210 Transcription kit (Qiagen), using 70 ng of RNA. The cDNA was quantified using the QIAExpert prior  
211 to dilution for use in quantitative PCR (qPCR). The qPCR was conducted as previously described  
212 (12), normalizing to β-2-microglobulin (*B2m*) and β-actin (*Actb*), using the corresponding forward  
213 and reverse primers: *Actb*, F-TGTTACCAACTGGGACGACA, R-GGGGTGTTGAAGTCTCAAA;  
214 *B2m*, F-CTTTCTGGTGCTTGTCTCACTG, R-AGCATTGGATTTCATGTGAG; *Cspg4*, F-  
215 CCTGGTAGGCTGCATAGAAGAT, R-CCAGGGTGGAGAAAGTTTCATA; *Fzd7*, F-  
216 AGAGATTTGGGGCGAGAGAT, R-CAGTTAGCATCGTCCTGCAA; *Lgr5*, F-  
217 CCTTGGCCCTGAACAAAATA, R-ATTTCTTTCCCAGGGAGTGG; *Lrp1*, F-  
218 GACCAGGTGTTGGACACAGATG, R-AGTCGTTGTCTCCGTCACACTTC; *Nectin3*, F-  
219 TTGCCCTTTCTTTGTCAAC, R-GCATGTCTGATGGTGGGAATG.

## 220 **RNA extraction, cDNA preparation and digital droplet PCR-analysis**

221         Colonic tissues collected from infected mice were placed in RNA<sup>later</sup><sup>™</sup> (Ambion) prior to  
222 RNA extraction. The tissues were then homogenized and total RNA was extracted using the  
223 RNeasy mini kit (Qiagen). One microgram of RNA was used for cDNA synthesis using a QuantiTect  
224 Reverse Transcription kit (Qiagen). The cDNA was quantified using the QIAExpert prior to dilution  
225 for use in digital droplet PCR (ddPCR). The ddPCR was conducted as previously described (12),



226 normalizing to  $\beta$ -2-microglobulin (*B2m*), using the corresponding forward and reverse primers, as  
227 follows:

228 *Asc2*, F-CAGGAGCTGCTTGACTTTTCCA, R-GGGCTAGAAGCAGGTAGGTCCA; *Axin1*, F-  
229 GCAGCTCAGCAAAAAGGGAAAT, R-TACATGGGGAGCACTGTCTCGT; *B2m*, F-  
230 CTTTCTGGTGCTTGTCTCACTG, R-AGCATTGGATTTCATGTGAG; *Bmi1*, F-  
231 ATGCATCGAACAACCAGAATC, R-GTCTGGTTTTGTGAACCTGGA; *c-myc*, F-  
232 CTAGTGCTGCATGAGGAGACAC, R-GTAGTTGTCTGGTGAGTGGAG; *Ephb2*, F-  
233 AGAATGGTGCCATCTTCCAG, R-GCACATCCACTTCTTCAGCA; *Fzd7*, F-  
234 AGAGATTTGGGGCGAGAGAT, R-CAGTTAGCATCGTCCTGCAA; *Lgr5*, F-  
235 CCTTGGCCCTGAACAAAATA, R-ATTTCTTTCCCAGGGAGTGG.

236 Following this, ddPCR was performed using 2x QX200 ddPCR EvaGreen Supermix (Bio-  
237 Rad), and 100 nM of each corresponding forward and reverse primer, as above. For each PCR  
238 reaction variable quantities of template cDNA were used (target gene dependent), with each  
239 reaction being performed in a final volume of 25  $\mu$ L. From this, 20  $\mu$ L was added to a DG8™  
240 Cartridge for droplet generation using QX200 Droplet Generation Oil for EvaGreen (Bio-Rad). The  
241 generated droplets were transferred to a 96-well PCR-plate (Eppendorf) and subjected to thermo-  
242 cycling as previously described (12). Transcript levels were quantified and adjusted to copies per  
243 10  $\mu$ g of cDNA before normalizing to the housekeeping gene *B2m*. The adjusted transcript levels  
244 were plotted as a fold-change relative to uninfected using GraphPad Prism 7, with statistical  
245 significance assessed using a Mann Whitney *U* test.

#### 246 **Growth of murine colonic-organoids from *C. difficile* infected mice**

247 Mouse colonic crypt isolation and organoid establishment were based on protocols  
248 previously described (8, 9). Intact, dissected colons from C57BL/6J mice (MARP) were flushed and  
249 scraped, as above. Colons were cut into 5 mm pieces and washed in cold PBS before digestion  
250 with 4 mM EDTA. Crypts were isolated from the tissues through vigorous re-suspension in cold  
251 PBS using a 10 mL pipette. This procedure was repeated a total of three times. Crypts were pelleted  
252 by centrifugation at 240 *g* for five minutes, at 4°C. The crypt pellet was resuspended in PBS, passed

253 through a 70  $\mu$ m cell strainer (BD) and centrifuged. The supernatant was discarded and the pellet  
254 containing the crypts was resuspended in matrigel (BD). Equal numbers of crypts in matrigel were  
255 seeded into each well of a 48-well plate (Nunc) and incubated for 10 minutes at 37°C until solidified.  
256 Crypt culture media (DMEM/F12 supplemented with B27 (Gibco), Glutamax (Gibco), N2 (Gibco),  
257 10 mM HEPES (Gibco), Fungizone (Gibco), 50 ng/mL EGF (Peprotech), 100 ng/mL Noggin  
258 (Peprotech), penicillin/streptomycin (Gibco), 2.5  $\mu$ M CHIR99021 (Bioscientific), 10  $\mu$ M Y-27632  
259 Rock inhibitor (Abcam), 10% R-spondin 1 conditioned media, and 50% WNT3a conditioned media)  
260 was added to each well. Organoid forming ability was assessed using the reazurin-based  
261 PrestoBlue reagent (Life Technologies), as previously described (12). Cell viability was measured  
262 according to the manufacturer's instructions and organoids were imaged using an EVOS FL Auto  
263 Cell Imaging System (Invitrogen). Viability was plotted using GraphPad Prism 7, with statistical  
264 significance assessed using a Mann Whitney *U* test.

#### 265 **TOPFlash assay**

266 500,000 HEK 293 STF cells were seeded in a 12 well dish for 18 hours. The media was  
267 then replaced with 1 mL of pre-warmed media with or without combinations of 1:5 molar ratio of  
268 human WNT3a (100 ng/mL, 2.67 nM, StemRD) to toxin (13.35 nM) for 20 hours. Following the  
269 incubation, the media was removed and cells were lysed in 110  $\mu$ L of Passive Lysis Buffer  
270 (Promega) for 15 minutes while shaking. The solubilized supernatant was collected and  
271 immediately used for the determination of the TOPFlash luciferase activities with the Steady-Glo  
272 Luciferase assay (Promega) and CellTiter Glo (Promega).

#### 273 **Treatment of colonic crypts with purified toxins and receptor-blocking proteins, and** 274 **assessment of organoid formation**

275 Colonic crypts were isolated from C57BL/6J mouse tissues as described previously. The  
276 crypt pellets were resuspended in PBS containing 1% FBS and supplemented with 5 nM purified  
277 VPI10463TcdB (Abcam) or 100 nM purified RT-027 TcdB. Blocking of toxin variants was conducted  
278 with respectively 50 nM or 1000 nM of either recombinant human FZD2 (see above), recombinant  
279 human FZD7 Fc chimera (R&D Systems), recombinant human CSPG4 (see above), recombinant

280 human NECTIN-3 (see above), recombinant human LGR5 Fc chimera (R&D Systems). After four  
281 hours at 4°C, the crypt pellets were washed twice with PBS and resuspended in Matrigel (BD), and  
282 12 µL were seeded into each well of a 48-well plate (Nunc) and incubated for 10 minutes at 37°C  
283 until solidified. The crypt culture media described above was added to each well. After 3 days, the  
284 medium was replaced with fresh culture medium without Y-27632 Rock inhibitor. After four days in  
285 culture, cell viability was measured using the PrestoBlue reagent (Life Technologies) and imaged  
286 using an EVOS FL Auto Cell Imaging System (Invitrogen). Viability was plotted using GraphPad  
287 Prism 7, with statistical significance assessed using a Mann Whitney *U* test.

### 288 **Treatment of human colonic-organoids with *C. difficile* TcdB**

289 Surgically resected normal colon samples were obtained following written informed  
290 consent from four patients at Cabrini hospital, Malvern, Australia. This study was approved by the  
291 Cabrini Human Research Ethics Committee (CHREC 04-19-01-15) and the Monash Human  
292 Research Ethics committee (MHREC ID 2518 CF15/332-2015000160). Patient recruitment was led  
293 by the colorectal surgeons in the Cabrini Monash University Department of Surgery. Tissue was  
294 washed and underlying muscle layers were removed with surgical scissors. Tissue was cut into 5  
295 mm pieces and washed eight times in cold chelation buffer (distilled water with 5.6 mM/L Na<sub>2</sub>HPO<sub>4</sub>,  
296 8.0 mM/L KH<sub>2</sub>PO<sub>4</sub>, 96.2 mM/L NaCl, 1.6 mM/L KCl, 43.4 mM/L sucrose, 54.9 mM/L D-sorbitol).  
297 Following incubation for 45 minutes at 4°C in 4 mM EDTA in chelation buffer, intestinal crypts were  
298 released from colonic tissue fragments by mechanically pipetting them with a 10 mL pipette in PBS  
299 as above. This procedure was repeated a total of three times. Crypts were pelleted by centrifugation  
300 at 240g for 5 minutes, at 4°C. The crypt pellet was resuspended in PBS, passed through a 100 µm  
301 cell strainer and centrifuged. The supernatant was discarded and the pellet containing the crypts  
302 was resuspended in matrigel (BD). Matrigel was seeded into each well of a 48 well plate and  
303 incubated until solidified. Crypt culture media (advanced DMEM/F12 supplemented with B27  
304 (Gibco), Glutamax (Gibco), N2 (Gibco), 10 mM HEPES (Gibco), 100 µg/mL Primocin (InvivoGen),  
305 100 ng/mL Noggin (Peprotech), 50 ng/ml EGF (Peprotech), 10 nM Gastrin (Sigma Aldrich), 500 nM  
306 A83-01 (Torcis), 10 µM SB2002190 (Sigma Aldrich), 2.5 µM CHIR99021 (Bioscientific), 10% R-

307 spondin 1 conditioned media, and 50% Wnt3a conditioned media) was added to each well. Ten  
308 micromoles of Y-27632 dihydrochloride kinase inhibitor (Torcis) was added after initial seeding for  
309 two days.

310 After the establishment of four human colonic-organoid lines, organoids were dissociated  
311 using TrypLE Express enzyme (Life technology). After dissociation, cells were pelleted and were  
312 resuspended in PBS containing 1% FBS and supplemented with 1 nM purified VPI10463 TcdB  
313 (Abcam) or 100 nM purified RT-027 TcdB. Blocking of toxin variants was conducted with 10 nM or  
314 1000 nM of recombinant human FZD7 (R&D Systems), respectively. After four hours at 4°C, the  
315 cells were washed twice with PBS and resuspended in Matrigel (BD), and re-seeded into 48 well  
316 plates. Organoids were cultured in crypt culture media for eight days before imaging using an EVOS  
317 FL Auto Cell Imaging System (Invitrogen). Additionally, cell viability was measured using the  
318 PrestoBlue reagent (Life Technologies). The experiments were performed in technical triplicate,  
319 per organoid line. Viability was plotted using GraphPad Prism 7, with statistical significance  
320 assessed using a One-way ANOVA and Tukey's multiple comparisons test.

#### 321 **Treatment of Vero cells with *C. difficile* TcdB**

322 Vero cells were cultured and prepared as previously described (6). Cells were seeded in  
323 96-well plates at  $1 \times 10^4$  cells/well, and incubated for 24 hours at 37°C in 5% CO<sub>2</sub>. Purified TcdB  
324 from strain VPI10463 (Abcam) or purified RT-027 TcdB was diluted in MEM- $\alpha$  containing 1% (v/v)  
325 FCS to concentrations of 1 pM, 0.5 pM, and 0.25 pM. Toxin preparations were incubated for 30  
326 minutes on ice with either recombinant human FZD2 (see above), recombinant human FZD7 Fc  
327 chimera (R&D Systems), recombinant human CSPG4 (see above), recombinant human NECTIN-  
328 3 (see above), recombinant human LGR5 Fc chimera (R&D Systems) or Bovine Serum Albumin  
329 (Sigma) each at concentrations of 100 pM, 50 pM, or 25 pM, to give a final ratio of 1:100  
330 toxin:recombinant protein. The toxin or toxin/recombinant protein complexes were added to the  
331 Vero cells (100  $\mu$ L/well) and incubated for four hours prior to removal, rinsing with PBS and  
332 replacement with fresh media. Cells treated with media alone were used as negative controls. All  
333 conditions were prepared in technical and biological triplicate. Morphological changes were

334 observed after 18 hours using an Olympus 1X71 inverted microscope at 20x magnification. The  
335 cytopathic effect was determined as a percentage of rounded cells in comparison to the negative  
336 control wells.

### 337 **Treatment of HeLa and Caco-2 cells with TcdB**

338 HeLa cells were plated at 7,500 cells per well in a 100 µl volume into 96 well dishes and  
339 grown for 18 hours prior to intoxication. Caco-2 cells were plated at 5000 cells per well in a 50 µl  
340 volume and grown for 48 hours before intoxication. Cells were maintained in Dulbecco's Modified  
341 Eagle's medium (DMEM; Gibco) in 10% fetal bovine serum (FBS; Atlanta Biologicals), and were  
342 grown in a humidified incubator at 37 °C with 5% CO<sub>2</sub> atmosphere. HeLa cells were treated with  
343 TcdB (TcdB<sub>10463</sub>, TcdB<sub>10463</sub><sup>GFE</sup> and TcdB<sub>027</sub>) for 2.5 hours before measuring viability, while Caco-2  
344 cells were treated for 24 hours before measuring viability by a CellTiterGlo (Promega) viability  
345 assay. CellTiterGlo assays were performed according to the manufacturer's protocol and were  
346 normalized to untreated conditions. Viability was plotted using GraphPad Prism 7, with statistical  
347 significance assessed using a Two-way ANOVA with comparisons made with respect to TcdB<sub>10463</sub>  
348 using Dunnett's multiple comparisons test.

### 349 **Sequence Analysis and Phylogeny**

350 Fully annotated genomes of *C. difficile* strains deposited on the National Center for  
351 Biotechnology Information (NCBI) was used as the source of sequences in this study. As of the  
352 time of writing, 78 annotated sequences have been deposited into the NCBI. The *C. difficile*  
353 PubMLST database (<https://pubmlst.org/cdifficile/>) was used to define the *C. difficile* sequence  
354 types for these 78 annotated sequences (13, 14). Redundant strains or strains that could not be  
355 sequence typed were excluded from sequence analysis. The *tcdB* gene from the unannotated *C.*  
356 *difficile* VPI 10463 strain used in this study was also included in the alignment, amounting to a total  
357 of 65 strains for analysis. The loci corresponding to *tcdB* from these 65 strains were translated to  
358 determine their TcdB amino acid sequence (15). The TcdB sequences were aligned using the  
359 ClustalW algorithm within the R package msa version 1.14.0 (16). The distance and relationships

360 of these aligned sequences was then determined using the FastME V2 NJ Tree algorithm  
361 associated with the GrapeTree Python 2.7 package (17). A dendrogram and alignment was created  
362 using the Interactive Tree of Life (18).

### 363 **Supplementary Appendix**

#### 364 **TcdB-producing strains of *C. difficile* induce significant weight loss, diarrhea and colonic** 365 **epithelial damage**

366 Differences in disease could be seen in the infections with genetically diverse *C. difficile*  
367 isolates, with disease severity correlating with the depth of epithelial damage. Infection with M7404,  
368 R20291, DLL3109 and VPI1046 resulted in severe disease, inducing ~18% weight loss relative to  
369 day zero within 48-hours of infection, limiting animal survival to 48-hours in almost all mice infected  
370 with these strains (Fig. S1a i). This heightened disease severity was linked with severe and  
371 devastating colonic damage, that penetrated deep into the epithelium, characterized by damage to  
372 the base of the colonic crypts, severe inflammation and edema (Fig. S1a) and an eight-point  
373 increase in pathology score when compared to tissues isolated from control animals ( $p=0.0079$ ;  
374 Fig. S1a ii). This level of intestinal damage was not seen with CD133, JGS6133, AI35 and 630  
375 infected mice, which had similar pathologies and damage scores to uninfected control mice, all of  
376 which were significantly lower than damage score for mice infected with M7404, R20291, DLL3109  
377 and VPI1046 ( $p>0.05$ ; Fig. S1a ii). M7404, R20291, DLL3109 and VPI1046 were capable of  
378 producing significantly higher levels of TcdA and TcdB during infection than CD133, JGS6133,  
379 AI35 and 630 ( $p<0.05$ ), which correlated with the level of damage observed for each strain. We  
380 suggest that higher toxin production during infection allows for cellular damage to occur at a rate  
381 much higher than normal cellular turnover and repair. Thus, damage of the mucosa can then reach  
382 the crypt base, exposing the otherwise protected stem cell compartment to intoxication.

383 To further characterize the progression of epithelial damage and depth of damage during  
384 CDI, mice were infected with either M7404 (WT; RT027), or an isogenic mutant strain lacking either  
385 TcdA (DLL3045, hereafter TcdA<sup>-</sup>B<sup>+</sup>), TcdB (DLL3101, hereafter TcdA<sup>+</sup>B<sup>-</sup>), or TcdA and TcdB  
386 (DLL3121, hereafter TcdA<sup>-</sup>B<sup>-</sup>) (5) and euthanized at either 12, 24 or 48-hours post-infection, to track

387 the progression of intestinal integrity collapse. Following *C. difficile* challenge with the panel of  
388 isogenic M7404 toxin mutants, mice began to lose weight within 12-hours of infection, for each  
389 strain tested (Fig. S1b). However, TcdB-producing strains (WT or TcdA<sup>-</sup>B<sup>+</sup>) induced rapid weight  
390 loss at 24 and 48-hours post-infection (Fig. S1b), which coincided with severe diarrhea and  
391 extensive colonic epithelial damage (Fig. S1c). By 48-hours of infection, weight loss was significant  
392 for all strains tested when compared to the uninfected mice which steadily put on weight (Fig. S1b  
393 iii,  $p < 0.05$ ). Notably, WT or TcdA<sup>-</sup>B<sup>+</sup> infection induced severe weight loss, up to 15-20% relative to  
394 day zero, which was significantly higher than seen for TcdA<sup>+</sup>B<sup>-</sup> and TcdA<sup>-</sup>B<sup>-</sup> infection (~8% and ~3%  
395 respectively;  $p < 0.05$ , Fig. S1c iii).

396 Consistent with previous results (5), CDT alone (TcdA<sup>-</sup>B<sup>-</sup>infection) did not play a role in the  
397 induction of colonic pathology in this model. Infection with TcdB-producing strains (WT or TcdA<sup>-</sup>B<sup>+</sup>)  
398 induced severe and extensive colonic epithelial damage that was most severe 48-hours post-  
399 infection (Fig. S1c, d). Specifically, colon pathology scores were significantly higher for infection  
400 with TcdB-producing strains than in mice infected with TcdB-negative (TcdA<sup>+</sup>B<sup>-</sup> and TcdA<sup>-</sup>B<sup>-</sup>) strains  
401 or uninfected mice, characterized by extensive mucosal damage, inflammation and edema in WT  
402 or TcdA<sup>-</sup>B<sup>+</sup>-infected mice (Fig. S1c, d;  $p < 0.05$ ). These disease features were absent in mice  
403 infected with TcdB-negative strains, except for weight loss, which occurred at lower levels than  
404 infection with TcdB-producing strains (Fig. S1b).

#### 405 **TcdB induces colonic epithelial apoptosis during CDI**

406 Since CDI induces extensive damage and inflammation throughout the colonic epithelium  
407 (Fig. S1c), we examined if the stem cell compartment, located at the base of the crypts, was being  
408 targeted during infection. Colonic tissue was examined for apoptosis by staining for activated  
409 caspase-3 and total numbers of apoptotic cells throughout the epithelium and at the base of the  
410 crypts (Fig. S2). These results suggest that TcdB, but not TcdA, is responsible for causing colonic  
411 epithelial cell apoptosis, as infection with TcdB-producing strains increases apoptosis at the crypt  
412 base, where the stem cell population resides, which may have a profound effect on stem cell  
413 function and the capacity for tissue regeneration following CDI.

414 Infection with WT and TcdA<sup>-</sup>B<sup>+</sup> strains resulted in a significant increase in total cellular  
415 apoptosis throughout the colonic crypts when compared to uninfected mice at 24-hours (p=0.0159)  
416 and 48-hours (p=0.0260 and p=0.001, respectively) and to TcdA<sup>-</sup>B<sup>-</sup> infection at 24-hours (p=0.0159)  
417 and 48-hours (p=0.0346 and p=0.001, respectively; Fig. S2). In contrast, the TcdA<sup>+</sup>B<sup>-</sup> strain did not  
418 cause apoptosis above levels observed for uninfected mice or in TcdA<sup>-</sup>B<sup>-</sup> infected mice, and  
419 induced significantly less total apoptosis when compared to WT and TcdA<sup>-</sup>B<sup>+</sup> infection at 48-hours  
420 (p=0.043 and p=0.001, respectively; Fig. S2). Importantly, at the later time point of infection with  
421 WT and TcdA<sup>-</sup>B<sup>+</sup> strains, the levels of apoptosis at the crypt base, where the stem cell population  
422 resides, had significantly increased in comparison to uninfected mice (p=0.011 for TcdA<sup>-</sup>B<sup>+</sup> infection  
423 only) and to TcdA<sup>-</sup>B<sup>-</sup> (p=0.0368 and p=0.0025, respectively) and TcdA<sup>+</sup>B<sup>-</sup> infection (p=0.013 and  
424 p=0.0025, respectively; Fig. S2).

#### 425 **TcdB alters stem cell signaling and gene transcription during CDI**

426 As TcdB appears to damage cells within the base of the colonic crypt (Fig. S2), and stem  
427 cell function appears to be altered by TcdB (Fig. 2 a) we next examined the effect that this may  
428 have on stem cell signaling. Quantitative digital droplet-PCR (ddPCR) was performed using seven  
429 genes that are representative markers of stem cells (*Bmi1*, *Ascl2*, *Ephb2* and *Lgr5*), WNT-signaling  
430 (*Axin2* and *Fzd7*) and cellular proliferation (*c-myc*), and the results normalized to uninfected mice  
431 (Figure 2b). Gene expression was altered across all strains of infection, with significant alterations  
432 in gene expression observed following TcdB mediated damage.

433 The role of TcdB in disrupting the stem cell compartment can also be clearly seen upon  
434 comparison of mice infected with TcdB-producing strains to those infected with the TcdA<sup>+</sup>B<sup>-</sup> strain,  
435 at 24-hours. Here, WT-infected mice expressed significantly less *Axin2* (p=0.0159), *Lgr5*  
436 (p=0.0286) and *Fzd7* (p=0.286) when compared to TcdA<sup>+</sup>B<sup>-</sup> infected mice (Fig. 2b i). When  
437 compared to TcdA<sup>-</sup>B<sup>-</sup> infected mice at 24-hours, WT-infected mice also expressed significantly less  
438 *Ascl2*, *Axin2*, *Fzd7* and *Lgr5* (p<0.05). TcdA<sup>-</sup>B<sup>+</sup>-infected mice showed similar low levels of stem cell  
439 gene expression to WT-infected mice, however significance was only seen when comparing *Lgr5*  
440 expression to TcdA<sup>-</sup>B<sup>-</sup>-infected mice (p=0.0357) and *Fzd7* to TcdA<sup>+</sup>B<sup>-</sup>-infected mice (p=0.0357). By



441 48-hours of infection, the effects of TcdB-producing strains on stem cell and WNT-signaling  
442 markers were more pronounced, with significantly reduced expression of *Ascl2*, *Axin2*, *Bmi1*, *Fzd7*  
443 and *Lgr5* ( $p<0.05$ ) detected in WT-infected mice as well as a significant reduction in *Axin2*  
444 ( $p=0.0317$ ), *Bmi1* ( $p=0.0317$ ) and *Lgr5* ( $p=0.0357$ ) in TcdA<sup>+</sup>B<sup>-</sup>-infected mice compared to TcdA<sup>-</sup>B<sup>-</sup>-  
445 infected mice (Fig. 2b ii). TcdA does not appear to alter the stem cell compartment or WNT-  
446 signaling 48-hours post-infection since similar levels of gene expression were detected in mice  
447 infected with TcdA<sup>+</sup>B<sup>-</sup> and TcdA<sup>-</sup>B<sup>-</sup> strains, and WT-infected mice expressed significantly less *Ascl2*,  
448 *Axin2*, *Bmi1*, *Fzd7* and *Lgr5* ( $p<0.05$ ) in comparison to those infected with the TcdA<sup>+</sup>B<sup>-</sup> strain (Fig.  
449 2b ii). Furthermore, comparison of TcdA<sup>-</sup>B<sup>+</sup> infection to TcdA<sup>+</sup>B<sup>-</sup> infection at 48-hours showed that  
450 there was a significant reduction in expression of the stem cell genes/markers *Axin2* and *Lgr5*  
451 ( $p=0.0317$  and  $p=0.0159$ , respectively; Fig. 2b ii), and expression of *EphB2* and *Fzd7* less than half  
452 that detected for TcdA<sup>+</sup>B<sup>-</sup> infection, providing further evidence that TcdB is disrupting the stem cell  
453 compartment.

#### 454 **TcdB receptors are expressed at high levels in the colonic LGR5 stem cells and their** 455 **daughter cells**

456 To assess the expression of known TcdB receptors in the cells of the colonic epithelium,  
457 and in particular the colonic stem cells and stem cell niche, we separated and sorted cells from  
458 colons of adult LGR5-eGFP-IRES-CreERT2 mice (11). Cells were sorted into LGR5 negative, low,  
459 medium and high or epithelial cell populations and qPCR was performed to examine the expression  
460 levels of TcdB receptors *Fzd7*, *Lrp1* and *Nectin3*. As expected, *Lgr5* expression was highest in the  
461 LGR5-GFP high cells ( $p<0.0001$ ), and decreased in expression relative to LGR5-GFP levels  
462 ( $p<0.05$ ; Fig. S3). Interestingly, both *Fzd7* and *Nectin3* were expressed at levels equivalent to *Lgr5*  
463 in the LGR5-GFP high colonic stem cells ( $p<0.001$ ; Fig. S3). *Fzd7* expression was also high in the  
464 LGR5-GFP medium cell population, which includes progenitor cells of the colon ( $p<0.05$ ; Extended  
465 Data Fig.3). Unlike *Fzd7* and *Nectin3* the TcdB co-receptor *Lrp1* was expressed at a consistent  
466 level throughout the LGR5 low, medium and high or epithelial cell populations, and highly  
467 expressed in the LGR5-GFP negative population ( $p<0.0001$ ; Fig. S3). As LRP1 acts as an

468 “internalizing receptor” (19), consistent expression throughout the colonic epithelium may assist  
469 TcdB internalization throughout various cells within the epithelial layer.

#### 470 **RT027 TcdB induces epithelial damage and stem cell death without binding to FZD receptors**

471 Although TcdB<sub>027</sub> was shown not to bind FZD proteins *in vitro* (Fig 4a), TcdB<sub>027</sub> was still  
472 able to induce stem cell death and dysfunction *in vivo* (Fig. 2). To confirm that all TcdB types used  
473 in our binding assays were indeed functional, we utilized a rectal instillation mouse toxicity model,  
474 and examined TcdB<sub>10463</sub>, TcdB<sub>027</sub> and TcdB<sub>10463</sub><sup>GFE</sup> for their ability to induce severe colonic damage.  
475 All three toxins were able to induce severe colonic damage, deep into the colonic mucosa, with  
476 damage down to the base of the crypts where the stem cells reside (Fig. S4c). Specifically, tissues  
477 from mice treated with TcdB<sub>10463</sub>, TcdB<sub>027</sub> and TcdB<sub>10463</sub><sup>GFE</sup> displayed large regions of hyperplasia,  
478 severe inflammation into both the mucosa and submucosa and a large amount of edema, when  
479 compared to the control tissues, which was reflected in the significantly higher histopathological  
480 scores of intoxicated mice ( $p < 0.05$ ; Fig. S4c). As both TcdB<sub>10463</sub> and TcdB<sub>027</sub> induce similar levels  
481 of damage, it appears that FZD binding may not be essential to induce stem cell death and  
482 dysfunction. To test this theory, we isolated crypts from uninfected mice, and intoxicated with  
483 purified TcdB<sub>10463</sub> and TcdB<sub>027</sub> toxins for four hours, before washing, and using these intoxicated  
484 cells for organoid culture. If unintoxicated, stem cells will remain viable and produce mature  
485 organoids in this culture system. Indeed, both toxins were capable of inhibiting organoid  
486 establishment, highlighting that TcdB can induce stem cell death and dysfunction irrespective of  
487 FZD binding, with multiple receptor binding pathways likely to induce stem cell death (Fig. 3b). This  
488 was confirmed by the partial blockage of TcdB<sub>10463</sub> but not TcdB<sub>027</sub> mediated stem cell death by  
489 FZD2 and FZD7, suggesting that TcdB has adapted several mechanisms to target these cells.

#### 490 **TcdB<sub>10463</sub> and TcdB<sub>027</sub> dose response in murine organoids**

491 To examine the differential receptor binding of TcdB<sub>10463</sub> and TcdB<sub>027</sub> in the context of our  
492 *in vivo* infection data, receptor blocking experiments were performed. Previous work with each toxin  
493 had determined a broad range of concentrations that could induce murine colonic epithelial cell  
494 death. To further define the concentration at which TcdB<sub>10463</sub> and TcdB<sub>027</sub> induces murine stem cell

495 death, we performed a dose response from 0.5 nM to 10 nM for TcdB<sub>10463</sub> and 1 nM to 100 nM for  
496 TcdB<sub>027</sub> (Fig S5a). Crypts from uninfected mice were isolated and intoxicated with purified TcdB<sub>10463</sub>  
497 and TcdB<sub>027</sub> toxins for 4 hours, before washing and using in organoid seeding. After 7 days,  
498 organoid viability was measured, to establish at what concentration each toxin could induce near  
499 complete stem cell death. These data indicated that 5 nM of TcdB<sub>10463</sub> and 100 nM of TcdB<sub>027</sub> were  
500 sufficient to induce a similar level of stem cell death, without complete ablation of organoid seeding,  
501 with organoid viability counts around 10% of that detected for untreated control organoids (Fig  
502 S5a).

### 503 ***C. difficile* mediated stem cell dysfunction induces long effects on intestinal repair**

504 Taken together, our data show that TcdB<sub>027</sub> induces severe and devastating epithelial  
505 damage deep into the mucosa, which damages the colonic stem cell compartment, altering their  
506 regenerative capacity at the peak of infection. However, the impact of this dysfunction on long term  
507 repair has not been explored. To assess this gap in enteric infection literature, we assessed mice  
508 that were infected with *C. difficile*, that reached a peak of infection, and then allowed them to  
509 recover, to two weeks post the peak of infection. Infected recovery mice began to steadily put on  
510 weight over the two weeks of recovery, reaching weights close to those measured pre-infection.  
511 However, this was significantly less than uninfected mice taken at the same time point, which had  
512 increased in weight by ~6%. As these mice were not treated with antibiotics to clear their infection  
513 we did not expect a complete cessation in *C. difficile* shedding. Interestingly, levels of *C. difficile*  
514 shedding had significantly dropped from ~5x10<sup>6</sup> CFU/100mg feces at the peak of infection, to less  
515 than 5x10<sup>3</sup> CFU/100mg feces two weeks post peak of infection. This correlated with a significant  
516 decrease in TcdB detection, with less than 1ng TcdB/100mg feces detectable at two weeks post  
517 peak of infection, compared to >50ng TcdB/100mg feces at the peak of infection. Despite the  
518 recovery and significant clearance of *C. difficile* in our infected mice, significant colonic tissue  
519 damage and stem cell dysfunction were still apparent when compared to uninfected mice (Fig. 4),  
520 highlighting that CDI has long term effects on stem cell function, which delay the recovery process.

521

522 **Table S1. Strains and Characteristics.**

| Strain                                         | Characteristics                                                                                                                                                            | Reference  |
|------------------------------------------------|----------------------------------------------------------------------------------------------------------------------------------------------------------------------------|------------|
| M7404                                          | <i>tcdA</i> <sup>+</sup> / <i>tcdB</i> <sup>+</sup> / <i>cdtAB</i> <sup>+</sup> , Clade 2, Ribotype 027, human clinical isolate, Canada, 2005.                             | (20)       |
| DLL3045<br>(TcdA <sup>-</sup> B <sup>+</sup> ) | M7404 derivative (M7404 <i>tcdA</i> TargeTron) <i>tcdA</i> <sup>-</sup> / <i>tcdB</i> <sup>+</sup> / <i>cdtAB</i> <sup>+</sup>                                             |            |
| DLL3101<br>(TcdA <sup>+</sup> B <sup>-</sup> ) | M7404 derivative (M7404 $\Omega$ <i>tcdB</i> TargeTron) <i>tcdA</i> <sup>+</sup> / <i>tcdB</i> <sup>-</sup> / <i>cdtAB</i> <sup>+</sup>                                    | (5)        |
| DLL3121<br>(TcdA <sup>-</sup> B <sup>-</sup> ) | M7404 derivative (M7404 $\Omega$ <i>tcdA</i> TargeTron, $\Omega$ <i>tcdB</i> TargeTron), <i>tcdA</i> <sup>-</sup> / <i>tcdB</i> <sup>-</sup> / <i>cdtAB</i> <sup>+</sup> . | (5)        |
| R20291                                         | <i>tcdA</i> <sup>+</sup> / <i>tcdB</i> <sup>+</sup> / <i>cdtAB</i> <sup>+</sup> , Clade 2, Ribotype 027, human clinical isolate, United Kingdom, 2006.                     | (21)       |
| DLL3109                                        | <i>tcdA</i> <sup>+</sup> / <i>tcdB</i> <sup>+</sup> / <i>cdtAB</i> <sup>+</sup> , Clade 2, Ribotype 027, human clinical isolate, Australia, 2010.                          | (22-24)    |
| VPI10463                                       | <i>tcdA</i> <sup>+</sup> / <i>tcdB</i> <sup>+</sup> / <i>cdtAB</i> <sup>-</sup> , Clade 1, Ribotype 003, Human isolate, reference strain, America, before 1982.            | (25, 26)   |
| 630                                            | <i>tcdA</i> <sup>+</sup> / <i>tcdB</i> <sup>+</sup> / <i>cdtAB</i> <sup>-</sup> , Clade 1, Ribotype 012, human clinical isolate, Switzerland, 1982.                        | (27, 28)   |
| JGS6133                                        | <i>tcdA</i> <sup>+</sup> / <i>tcdB</i> <sup>+</sup> / <i>cdtAB</i> <sup>+</sup> , Clade 5, Ribotype 078, porcine isolate, America, before 2013.                            | (29)       |
| AI35                                           | <i>tcdA</i> <sup>-</sup> / <i>tcdB</i> <sup>+</sup> (variant)/ <i>cdtAB</i> <sup>+</sup> , Clade 5, Ribotype 237, porcine isolate, Australia, 2013.                        | (29)       |
| CD133                                          | <i>tcdA</i> <sup>-</sup> / <i>tcdB</i> <sup>-</sup> / <i>cdtAB</i> <sup>-</sup> , Clade 1, AUS-ribotype 091*, human clinical isolate, Australia, 2008.                     | This Study |

523 \*AUS-ribotyping

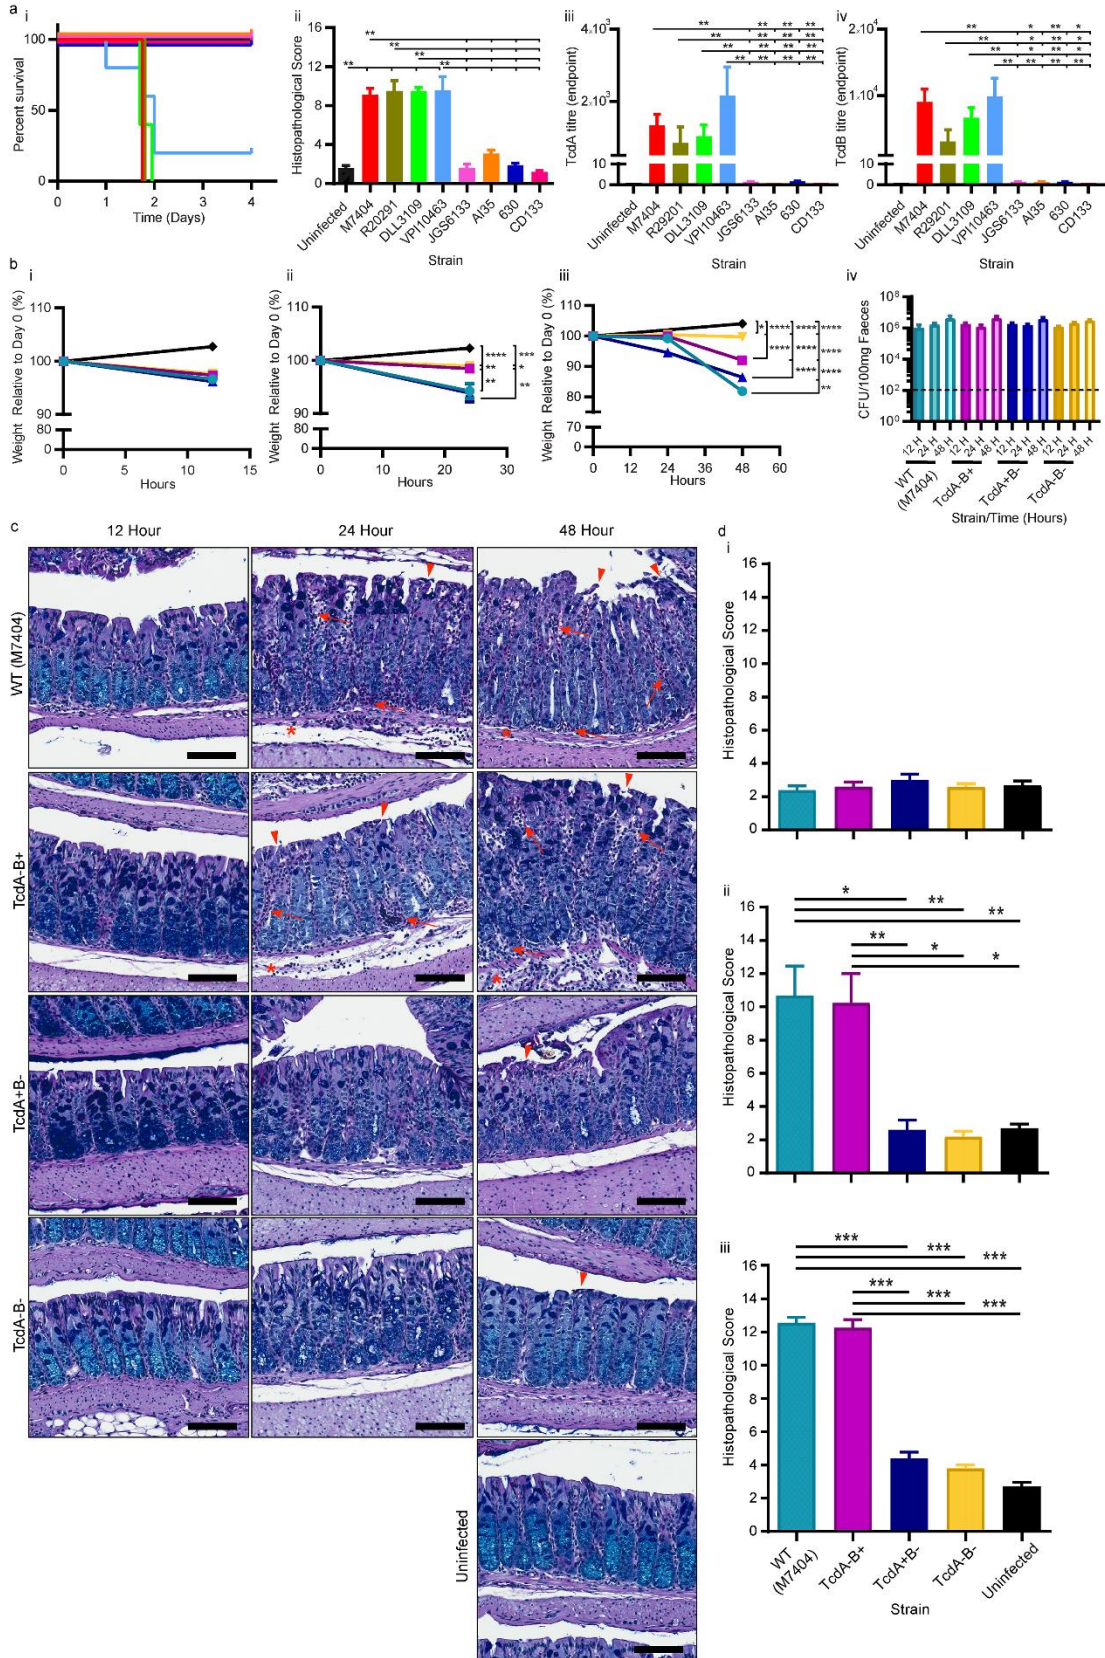

525 **Fig. S1. *C. difficile* induces severe and deep epithelial damage and weight loss,**  
526 **predominantly though TcdB. a)** Mice were infected with a panel of genetically distinct *C. difficile*  
527 isolates and monitored for disease severity and weight loss. Mice that lost >10% body weight within  
528 24-hours of >15% thereafter were euthanized. **i)** Kaplan-Meier survival curve, **ii)** Representative  
529 PAS/Alcian blue stained colonic tissue collected and scored at time of euthanasia, **iii)** TcdA titer of  
530 fecal samples tested on HT29 cells, and **iv)** TcdB titer of fecal samples tested on Vero cells. **b)**  
531 C57BL/6J mice were challenged with M7404 (WT) (teal), TcdA<sup>-</sup>B<sup>+</sup> (fuchsia), TcdA<sup>+</sup>B<sup>-</sup> (blue), and  
532 TcdA<sup>-</sup>B<sup>-</sup> (yellow) isogenic *C. difficile* spores or left uninfected (black), euthanizing separate groups  
533 at 12, 24 or 48-hours post-infection. Weight loss relative to day zero for individual groups following  
534 infection or uninfected mice euthanized at **i)** 12-hours, **ii)** 24-hours and **iii)** 48-hours post-infection.  
535 **iv)** Fecal spore shedding of *C. difficile* at time of euthanasia. **c)** Representative PAS/Alcian blue  
536 stained colonic tissue collected at 12, 24 and 48-hours post-infection with WT, TcdA<sup>-</sup>B<sup>+</sup>, TcdA<sup>+</sup>B<sup>-</sup>,  
537 and TcdA<sup>-</sup>B<sup>-</sup> *C. difficile* or from uninfected mice (48-hours). Arrow=Inflammation; Arrowhead=crypt  
538 damage/goblet cell loss; Asterisk=Edema. Scale bar = 100 μm. **d)** Histopathological scores for **i)**  
539 12-hours, **ii)** 24-hours and **iii)** 48-hours post-infection were plotted. n≥5. \*  $p \leq 0.05$ , \*\*  $p \leq 0.01$ , \*\*\*  
540  $p \leq 0.001$ , \*\*\*\*  $p \leq 0.0001$ . See also Fig. 1.

541

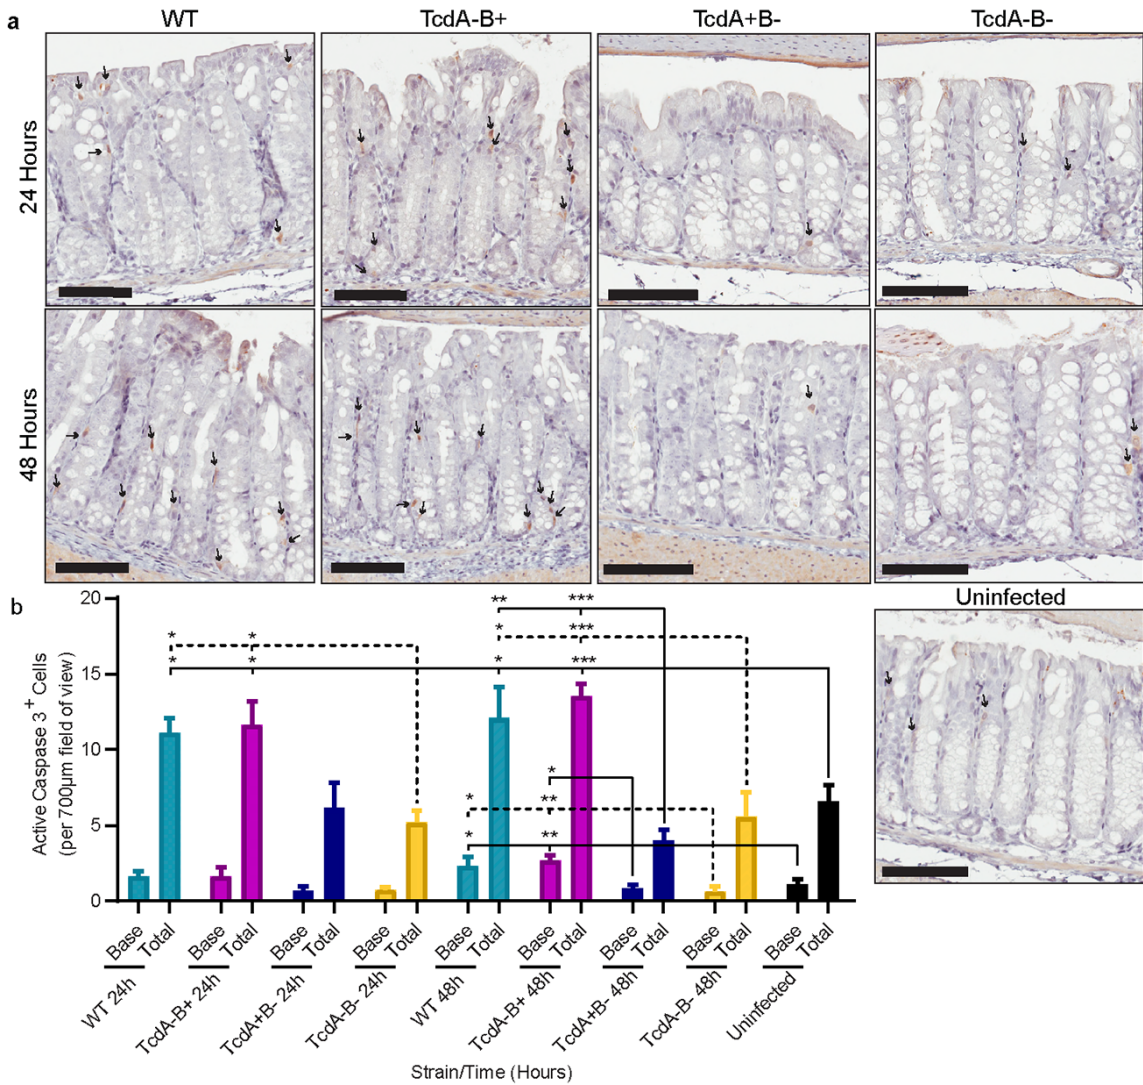

542

543 **Fig. S2. *C. difficile* infection induces epithelial cell apoptosis, which is associated with**

544 **infection with TcdB-producing strains.** Colonic tissues were collected at 24 and 48-hours post-

545 infection with WT, TcdA-B<sup>+</sup>, TcdA+B<sup>-</sup>, and TcdA-B<sup>-</sup> *C. difficile* strains and from uninfected mice (48-

546 hours). **a**) Representative images of tissues stained for activated caspase-3 (brown cells and

547 arrow). **b**) Activated caspase-3 cell counts per 700 μm field of view are shown. n≥5, Scale Bar =

548 100 μm. Data are represented as mean + S.E.M. \* p≤ 0.05, \*\* p≤ 0.01, \*\*\* p≤ 0.001. See also, Fig.

549 2.

550

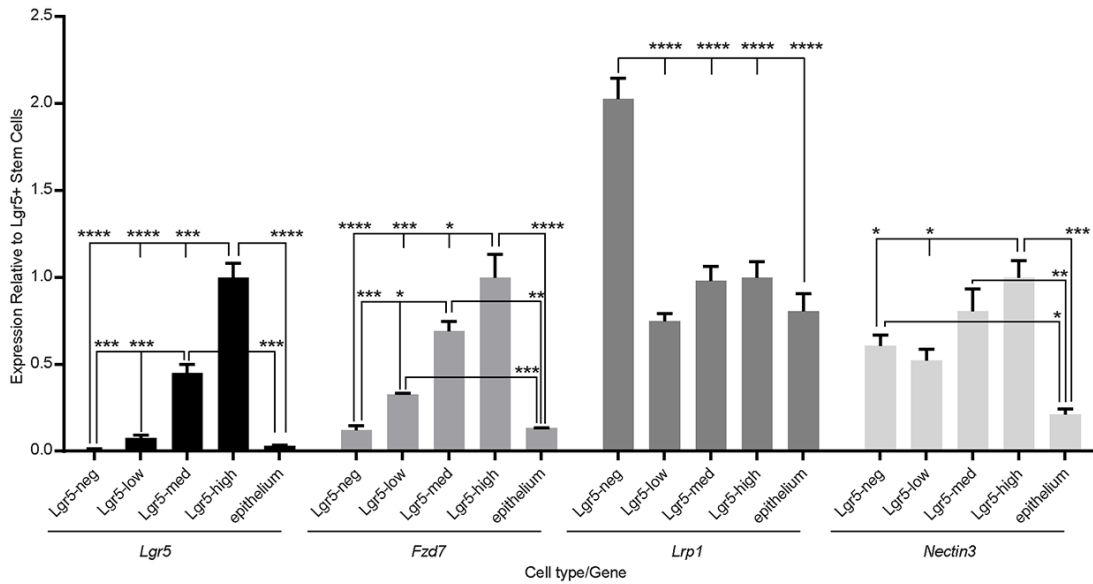

551

552 **Fig. S3. Colonic stem cells and their daughter cells express TcdB receptors.** Colonic cells  
 553 from adult LGR5-eGFP-IRES-CreERT2 mice were isolated, stained and sorted prior to RNA  
 554 isolation and cDNA synthesis. qPCR was then used to quantify the expression levels of *Lgr5*, *Fzd7*,  
 555 *Lrp1* and *Nectin3* in differentiated cells (LGR5-neg), progenitor cells (LGR5-low and LGR5 medium  
 556 (med)), colonic stem cells (LGR5-high) and total epithelial cells. n=3. Data are represented as mean  
 557 + S.E.M \*  $p \leq 0.05$ , \*\*  $p \leq 0.01$ , \*\*\*  $p \leq 0.001$ , \*\*\*\*  $p \leq 0.0001$ . See also, Fig. 3.

558



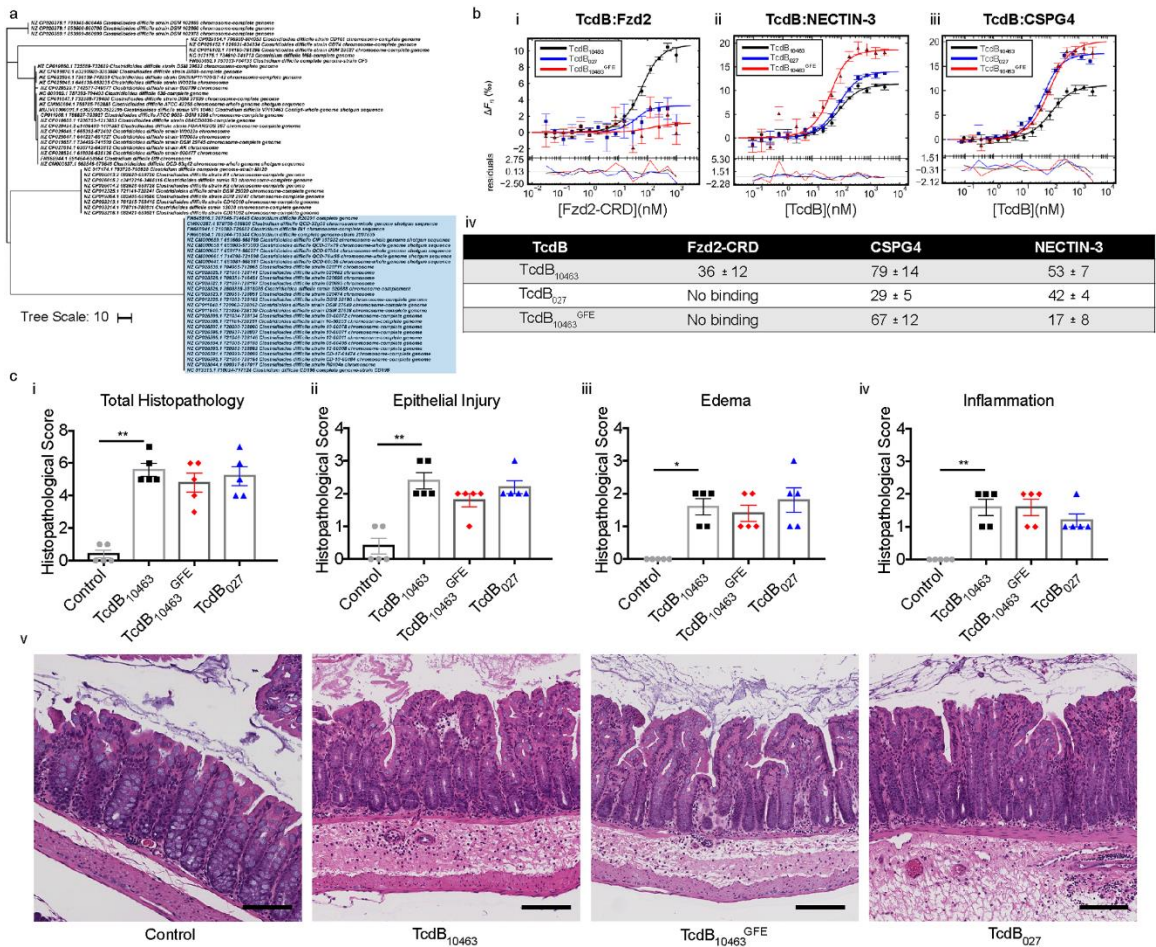

559

560 **Fig. S4. TcdB<sub>027</sub> does not bind FZD proteins, but still induces severe colonic damage.** a) A  
 561 phylogenetic tree was generated from an alignment of TcdB amino acid sequences from annotated  
 562 *C. difficile* genomes deposited in NCBI. The blue shade highlights RT027 strains of *C. difficile* and  
 563 reveals that these strains have identical TcdB sequences. b) Microscale thermophoresis (MST)  
 564 responses with TcdBs titrated against a 16-step serial dilution of i) FZD2-CRD, ii) NECTIN-3 and  
 565 iii) CSPG4 titrated against serial dilutions of TcdBs. Curves were fit to a one-site binding model to  
 566 determine K<sub>D</sub> values (nM). The confidence intervals were calculated from three independent  
 567 experiments in PALMIST using the variance-covariance method. iv) K<sub>D</sub> values between TcdBs and  
 568 their receptors determined by MST. c) Individual scoring of mice colon exposed for 4 hours with  
 569 PBS or 50 μg TcdB as described by i) total histopathology, ii) epithelial injury, iii) edema, and iv)  
 570 inflammation. v) Representative H&E images of tissue from mice injected with either PBS or 50 μg

571 of TcdB. Scale bar = 100  $\mu$ M. n=5. Data are represented as mean + S.E.M. \*  $p \leq 0.05$ , \*\*  $p \leq 0.01$ ,  
572 One-way Kruskal-Wallis with Dunn's post-hoc test for multiple comparisons. See also Fig. 3.

573

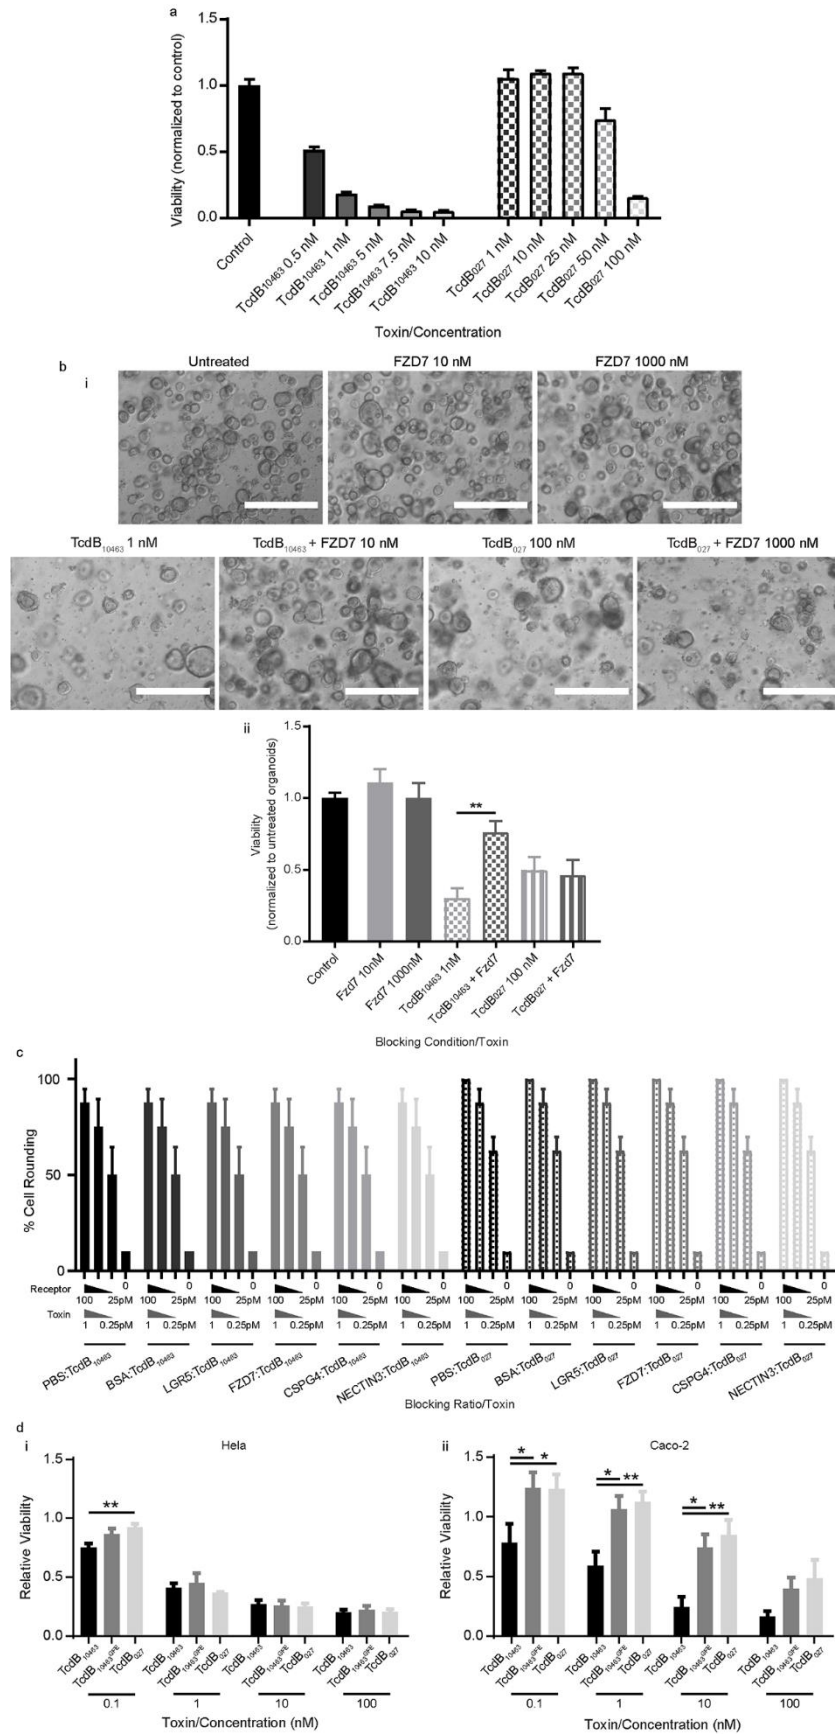

575 **Fig. S5. TcdB<sub>10463</sub> and TcdB<sub>027</sub> can bind to cells in FZD dependent and independent**  
576 **mechanisms. a)** Equal numbers of colonic crypts were isolated from uninfected mice and then  
577 exposed to a range of TcdB<sub>10463</sub> and TcdB<sub>027</sub> doses (0.5 – 10 nM and 1 – 100 nM, respectively) to  
578 identify a suitable dose for intoxication blocking experiments. **b)** Equal numbers of dissociated  
579 human colonic organoid cells were exposed to toxin, with or without recombinant FZD7 prior to  
580 organoid seeding. **i)** Representative images of organoids at day eight cultured from cells incubated  
581 for four hours with 1 nM of TcdB<sub>10463</sub> or 100 nM TcdB<sub>027</sub>. Blocking was conducted with 10nM or  
582 1000 nM, respectively, of recombinant FZD7. Untreated controls and organoids treated with FZD7  
583 alone are shown; n=4, scale bar = 400 μM. **ii)** cell viability, as assessed *via* a PrestoBlue assay,  
584 was measured at day eight post seeding. Data are represented as mean + S.E.M. \*\* p≤ 0.01, One-  
585 way ANOVA, Tukey's multiple comparison test. **c)** Vero cells seeded at 10<sup>4</sup> cells per well were  
586 cultured following a four-hour exposure to TcdB<sub>10463</sub> and TcdB<sub>027</sub> that was treated with either PBS,  
587 BSA, or recombinant receptor using a range of TcdB concentrations (1 pM, 0.5 pM and 0.25 pM)  
588 in a ratio of 1:100 of toxin to added protein or left untreated (media alone). **d)** Hela and Caco-2 cells  
589 seeded at 7.5 x 10<sup>3</sup> and 5 x 10<sup>3</sup> cells per well, respectively, were cultured following exposure to  
590 TcdB<sub>10463</sub> (black), TcdB<sub>10463</sub><sup>GFE</sup> (dark grey), and TcdB<sub>027</sub> (light grey) at a range of concentrations  
591 (0.1 nM, 1 nM, 10 nM and 100 nM). Cell viability was measured using an ATP viability indicator  
592 (CellTiterGlo) at **i)** 2.5 hours of exposure on Hela cells or **ii)** 24 hours on Caco-2 cells. n = 3; Data  
593 are represented as mean + S.E.M. \* p≤ 0.05, \*\* p≤ 0.01, Two-way Kruskal-Wallis with Dunn's post-  
594 hoc test for multiple comparisons. See also Fig. 3.

595

596 **References**

597

- 598 1. R. Chandrasekaran, A. K. Kenworthy, D. B. Lacy, *Clostridium difficile* Toxin A Undergoes  
599 Clathrin-Independent, PACSIN2-Dependent Endocytosis. *PLoS Pathog* **12**, e1006070  
600 (2016).
- 601 2. T. Loo, M. L. Patchett, G. E. Norris, J. S. Lott, Using secretion to solve a solubility  
602 problem: high-yield expression in *Escherichia coli* and purification of the bacterial  
603 glycoamidase PNGase F. *Protein Expr. Purif.* **24**, 90-98 (2002).
- 604 3. T. H. Scheuermann, S. B. Padrick, K. H. Gardner, C. A. Brautigam, On the acquisition  
605 and analysis of microscale thermophoresis data. *Anal. Biochem.* **496**, 79-93 (2016).
- 606 4. S. A. Lyon, M. L. Hutton, J. I. Rood, J. K. Cheung, D. Lyras, CdtR regulates TcdA and  
607 TcdB production in *Clostridium difficile*. *PLoS Pathog* **12**, e1005758 (2016).
- 608 5. G. P. Carter *et al.*, Defining the roles of TcdA and TcdB in localized gastrointestinal  
609 disease, systemic organ damage, and the host response during *Clostridium difficile*  
610 infections. *mBio* **6** (2015).
- 611 6. D. Lyras *et al.*, Toxin B is essential for virulence of *Clostridium difficile*. *Nature* **458**, 1176-  
612 1179 (2009).
- 613 7. C. M. Theriot *et al.*, Cefoperazone-treated mice as an experimental platform to assess  
614 differential virulence of *Clostridium difficile* strains. *Gut Microbes* **2**, 326-334 (2011).
- 615 8. T. Jarde *et al.*, *In vivo* and *in vitro* models for the therapeutic targeting of Wnt signaling  
616 using a Tet-ODeltaN89beta-catenin system. *Oncogene* **32**, 883-893 (2013).
- 617 9. C. M. Nefzger *et al.*, A Versatile Strategy for Isolating a Highly Enriched Population of  
618 Intestinal Stem Cells. *Stem Cell Reports* **6**, 321-329 (2016).
- 619 10. T. Jarde, G. Kerr, R. Akhtar, H. E. Abud, Modelling Intestinal Carcinogenesis Using *In*  
620 *Vitro* Organoid Cultures. *Methods Mol. Biol.* **1725**, 41-52 (2018).
- 621 11. N. Barker *et al.*, Identification of stem cells in small intestine and colon by marker gene  
622 *Lgr5*. *Nature* **449**, 1003-1007 (2007).

- 623 12. K. Horvay *et al.*, Snai1 regulates cell lineage allocation and stem cell maintenance in the  
624 mouse intestinal epithelium. *EMBO J.* **34**, 1319-1335 (2015).
- 625 13. D. Griffiths *et al.*, Multilocus sequence typing of *Clostridium difficile*. *J. Clin. Microbiol.* **48**,  
626 770-778 (2010).
- 627 14. K. A. Jolley, M. C. Maiden, BIGSdb: Scalable analysis of bacterial genome variation at  
628 the population level. *BMC Bioinformatics* **11**, 595 (2010).
- 629 15. P. Stothard, The sequence manipulation suite: JavaScript programs for analyzing and  
630 formatting protein and DNA sequences. *Biotechniques* **28**, 1102, 1104 (2000).
- 631 16. U. Bodenhofer, E. Bonatesta, C. Horejs-Kainrath, S. Hochreiter, msa: an R package for  
632 multiple sequence alignment. *Bioinformatics* **31**, 3997-3999 (2015).
- 633 17. Z. Zhou *et al.*, GrapeTree: visualization of core genomic relationships among 100,000  
634 bacterial pathogens. *Genome Res.* **28**, 1395-1404 (2018).
- 635 18. I. Letunic, P. Bork, Interactive Tree Of Life (iTOL) v4: recent updates and new  
636 developments. *Nucleic Acids Res* 10.1093/nar/gkz239 (2019).
- 637 19. D. Schottelndreier *et al.*, Expression and (Lacking) Internalization of the Cell Surface  
638 Receptors of *Clostridioides difficile* Toxin B. *Front Microbiol* **9**, 1483 (2018).
- 639 20. G. P. Carter *et al.*, Binary toxin production in *Clostridium difficile* is regulated by CdtR, a  
640 LytTR family response regulator. *J. Bacteriol.* **189**, 7290-7301 (2007).
- 641 21. R. A. Stabler *et al.*, Comparative genome and phenotypic analysis of *Clostridium difficile*  
642 027 strains provides insight into the evolution of a hypervirulent bacterium. *Genome Biol*  
643 **10**, R102 (2009).
- 644 22. G. P. Carter *et al.*, The anti-sigma factor TcdC modulates hypervirulence in an epidemic  
645 BI/NAP1/027 clinical isolate of *Clostridium difficile*. *PLoS Pathog* **7**, e1002317 (2011).
- 646 23. M. Richards *et al.*, Severe infection with *Clostridium difficile* PCR ribotype 027 acquired in  
647 Melbourne, Australia. *Med. J. Aust.* **194**, 369-371 (2011).
- 648 24. S. K. Lim *et al.*, Emergence of a ribotype 244 strain of *Clostridium difficile* associated with  
649 severe disease and related to the epidemic ribotype 027 strain. *Clin. Infect. Dis.* **58**,  
650 1723-1730 (2014).

- 651 25. J. F. Torres, I. Lonnroth, Purification and characterisation of two forms of toxin B  
652 produced by *Clostridium difficile*. *FEBS Lett.* **233**, 417-420 (1988).
- 653 26. N. M. Sullivan, S. Pellett, T. D. Wilkins, Purification and characterization of toxins A and B  
654 of *Clostridium difficile*. *Infect Immun* **35**, 1032-1040 (1982).
- 655 27. J. Wust, N. M. Sullivan, U. Hardegger, T. D. Wilkins, Investigation of an outbreak of  
656 antibiotic-associated colitis by various typing methods. *J. Clin. Microbiol.* **16**, 1096-1101  
657 (1982).
- 658 28. J. Wust, U. Hardegger, Transferable resistance to clindamycin, erythromycin, and  
659 tetracycline in *Clostridium difficile*. *Antimicrob. Agents Chemother.* **23**, 784-786 (1983).
- 660 29. M. M. Squire *et al.*, Novel molecular type of *Clostridium difficile* in neonatal pigs, Western  
661 Australia. *Emerg. Infect. Dis.* **19**, 790-792 (2013).

662
